# Supplementary material for: Functional Segments on Intrinsically Disordered Regions in Disease-Related Proteins
Source: MDPI journal article supplement (doi:10.3390/biom9030088), 2019-03-05
Supplement: s1 [file s1]

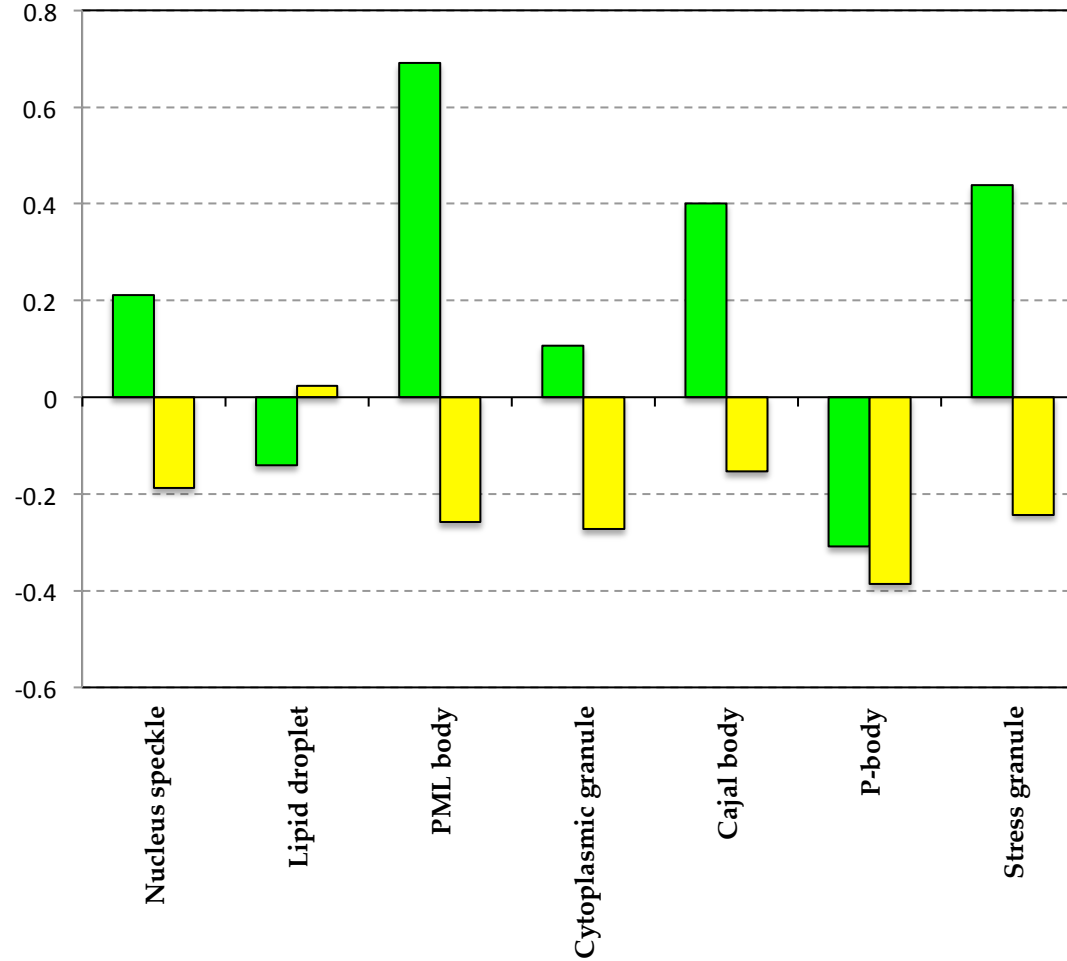

Figure S2. The non-membrane organelles found in the annotations of the disease-related proteins . The bars represent the degree of over-representation in each of the location categories, where green represents pProS-containing proteins, and yellow represents non-pProS proteins (see also Materials and Methods).
