# Supplementary material for: Functional Segments on Intrinsically Disordered Regions in Disease-Related Proteins
Source: MDPI journal article supplement (doi:10.3390/biom9030088), 2019-03-05
Supplement: s1 [file s1]

Table S4. Annotations found on IDRs in the model organisms

| Organism    | mutagenesis site | region of interest | short sequence motif |
|-------------|------------------|--------------------|----------------------|
| Mouse       | 1703             | 253                | 1160                 |
| Rat         | 620              | 161                | 575                  |
| A. thaliana | 932              | 44                 | 595                  |
| yeast       | 614              | 161                | 575                  |

The predictions of IDRs were done only by DICHOT, and the annotations shorter than 10 residues were considered.
