# Supplementary material for: Functional Segments on Intrinsically Disordered Regions in Disease-Related Proteins
Source: MDPI journal article supplement (doi:10.3390/biom9030088), 2019-03-05
Supplement: s1 [file s1]

a)

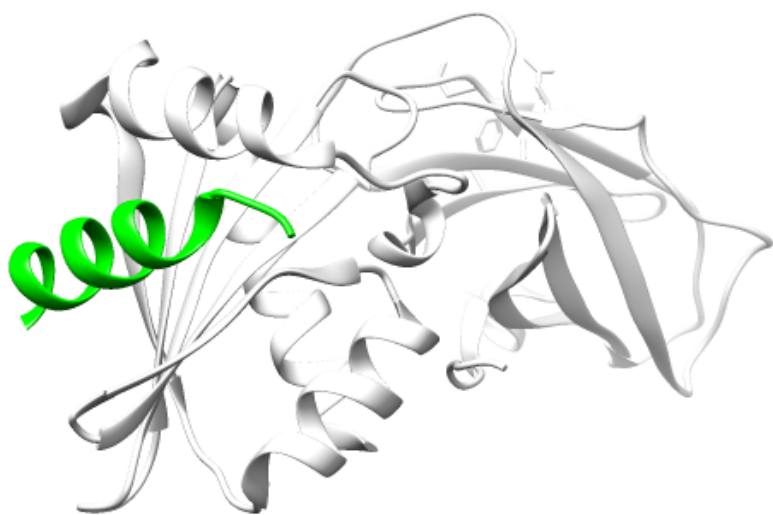

b)

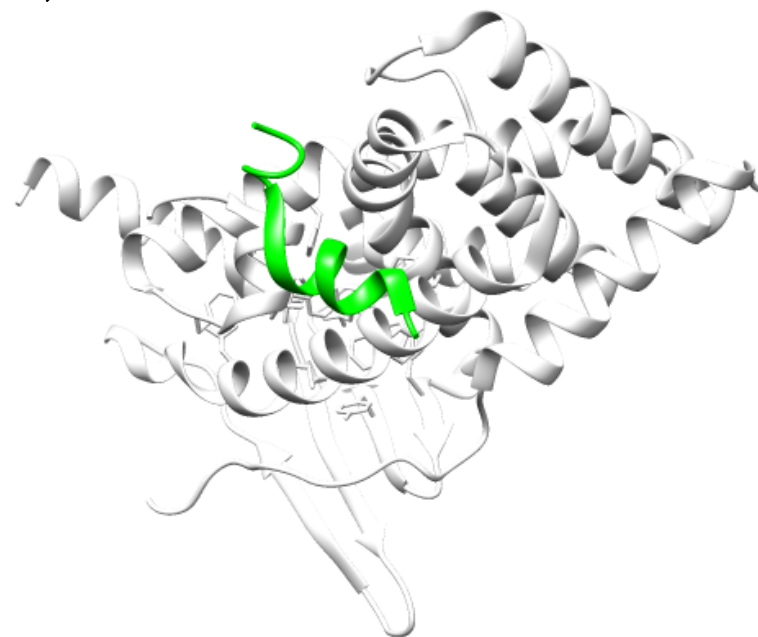

Figure S1. A structural example of a functional fragment found in an experimentally verified IDR. a) The structure of the AP-2 complex binding region (green) of phosphotyrosine-binding domain protein (ARH) binding upon AP-2 beta-subunit (white) (PDB: 2g30). B) A typical ProS structure of nuclear receptor co-activator 1 (green) (IDEAL: IID50084) binding upon nuclear receptor subfamily 1 group I (white).
