# Supplementary material for: Functional Segments on Intrinsically Disordered Regions in Disease-Related Proteins
Source: MDPI journal article supplement (doi:10.3390/biom9030088), 2019-03-05
Supplement: s1 [file s1]

Table S1. pProSs frequently found in the disease-related proteins.

| feature name                          | #counts | #proteins | description                                      |
|---------------------------------------|---------|-----------|--------------------------------------------------|
| Nuclear localization signal           | 92      | 83        | sequence targeting to nucleus                    |
| Cell attachment site                  | 49      | 18        | cell adhesion related sequence                   |
| PDZ-binding                           | 20      | 20        | PDZ domain binding                               |
| LXXLL motif                           | 16      | 11        | essential for interaction with nuclear receptors |
| SH3-binding                           | 15      | 12        | SH3 domain binding                               |
| DNA-binding                           | 14      | 7         | DNA binding                                      |
| Nuclear export signal                 | 12      | 10        | sequence exporting from nucleus                  |
| PPPSP motif                           | 9       | 2         | phosphorylation site                             |
| Abolishes interaction with PCNA.      | 8       | 2         | sites inhibiting interaction with PCNA           |
| Bipartite nuclear localization signal | 8       | 8         | sequence targeting to nucleus                    |
| Microbody targeting signal            | 8       | 8         | sequence targeting microbody                     |
| Prevents secretion from ER            | 8       | 8         | short segments preventing secretion              |
