# Supplementary material for: Functional Segments on Intrinsically Disordered Regions in Disease-Related Proteins
Source: MDPI journal article supplement (doi:10.3390/biom9030088), 2019-03-05
Supplement: s1 [file s1]

Table S2. The list of disease involving p53.

| category | disease                            |
|----------|------------------------------------|
| Can      | Adrenal carcinoma                  |
| Can      | Adult T-cell leukemia              |
| Can      | Basal cell carcinoma               |
| Can      | Bladder cancer                     |
| Can      | Breast cancer                      |
| Can      | Burkitt lymphoma                   |
| Can      | Cancer of the anal canal           |
| Can      | Cholangiocarcinoma                 |
| Can      | Choriocarcinoma                    |
| Can      | Chronic lymphocytic leukemia (CLL) |
| Can      | Chronic myeloid leukemia (CML)     |
| Can      | Colorectal cancer                  |
| Can      | Endometrial cancer                 |
| Can      | Esophageal cancer                  |
| Can      | Fallopian tube cancer              |
| Can      | Gallbladder cancer                 |
| Can      | Gastric cancer                     |
| Can      | Glioma                             |
| Can      | Hairy-cell leukemia                |
| Can      | Hepatic angiosarcoma               |
| Can      | Hepatocellular carcinoma           |
| Can      | Kaposi sarcoma                     |
| Can      | Laryngeal cancer                   |
| Can      | Malignant pleural mesothelioma     |
| Can      | Mantle cell lymphoma               |
| Can      | Medulloblastoma                    |
| Can      | Melanoma                           |
| Can      | Merkel cell carcinoma              |
| Can      | Multiple myeloma                   |
| Can      | Mycosis fungoides                  |
| Can      | Non-small cell lung cancer         |
| Can      | Oral cancer                        |
| Can      | Oropharyngeal cancer               |
| Can      | Osteosarcoma                       |
| Can      | Ovarian cancer                     |
| Can      | Pancreatic cancer                  |
| Can      | Penile cancer                      |
| Can      | Small cell lung cancer             |
| Can      | Squamous cell carcinoma            |
| Can      | Thyroid cancer                     |
| Can      | Vulvar cancer                      |
| Car      | Myelodysplastic syndrome           |
| Mus      | Giant cell tumor of bone           |
| Ner      | Choroid plexus papilloma           |
| Oth      | Li-Fraumeni syndrome               |
