# Supplementary material for: Functional Segments on Intrinsically Disordered Regions in Disease-Related Proteins
Source: MDPI journal article supplement (doi:10.3390/biom9030088), 2019-03-05
Supplement: s1 [file s1]

Uniprot human proteome

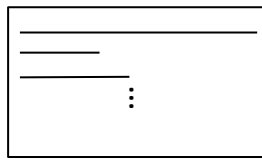

Mobi-light, disopred3, DICHOT

Disorder prediction: Those regions where any of the two programs predicted as an IDR were defined as IDRs.

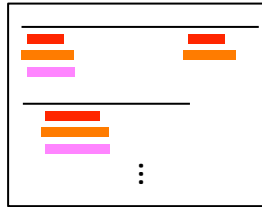

Uniprot annotation

pProS search: Uniprot annotations overlapped with IDRs were searched by the in-house scripts.

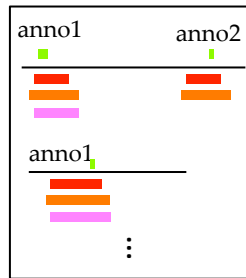

Disease assignment: KEGG DISEASE assigns human diseases to uniprot proteins.

KEGG DISEASE

Cancers

Cardiovascular diseases

Congenital disorders of metabolism

Cancers of endocrine organs

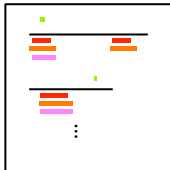

Cancers of male genital organs

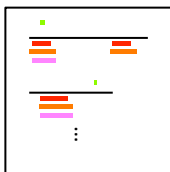

⋮

Cardiac disease

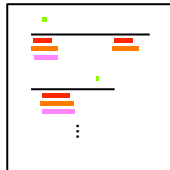

Hypertensive diseases

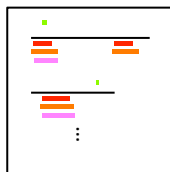

⋮

Peroxisomal disease

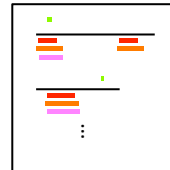

Mitochondrial diseases

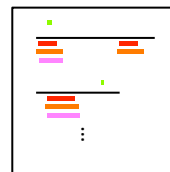

⋮

.....

.....
