# Supplementary material for: Functional Segments on Intrinsically Disordered Regions in Disease-Related Proteins
Source: MDPI journal article supplement (doi:10.3390/biom9030088), 2019-03-05
Supplement: s1 [file s1]

Table S6: Proteins involved in multiple diseases.

| protein name                                                                                         | Uniprot<br>accession | #disease<br>annotated | content of disease annotaion                   |
|------------------------------------------------------------------------------------------------------|----------------------|-----------------------|------------------------------------------------|
| Cellular tumor antigen p53                                                                           | P04637               | 46                    | Can(42),Car(1),Mus(1),Ner(1),Oth(1)            |
| Cyclin-dependent kinase inhibitor 2A                                                                 | P42771               | 27                    | Can(26), End(1)                                |
| GTPase KRas                                                                                          | P01116               | 22                    | Can(18), Mal(4)                                |
| Myc proto-oncogene protein                                                                           | P01106               | 18                    | Can(18)                                        |
| HLA class II histocompatibility antigen, DRB1-3 chain                                                | P01912               | 17                    | Car(3), End(1), Imm(9), Ner(2), Ski(2)         |
| Phosphatidylinositol 3,4,5-trisphosphate 3-phosphatase and dual-specificity protein phosphatase PTEN | P60484               | 14                    | Can(11), Mal(3)                                |
| Collagen alpha-1(II) chain                                                                           | P02458               | 13                    | Mal(9), Mus(3), Ner(1)                         |
| HLA class II histocompatibility antigen, DQ beta 1 chain                                             | P01920               | 13                    | Car(2), Dig(1), End(1), Imm(6), Ner(1), Ski(2) |
| GTPase NRas                                                                                          | P01111               | 12                    | Can(8), Car(1), Mal(2), Imm(1)                 |
| Fibroblast growth factor receptor 3                                                                  | P22607               | 12                    | Can(2), Mal(10)                                |
