# Supplementary material for: Functional Segments on Intrinsically Disordered Regions in Disease-Related Proteins
Source: MDPI journal article supplement (doi:10.3390/biom9030088), 2019-03-05
Supplement: s1 [file s1]

Table S5: The redundancy of pProS by the disease categories.

|                                    | pProS<br>counts | #uniq<br>pProSs | pProS<br>redundancy | #proteins |
|------------------------------------|-----------------|-----------------|---------------------|-----------|
| Cancers                            | 859             | 147             | 5.8                 | 204       |
| Cardiovascular diseases            | 144             | 93              | 1.5                 | 335       |
| Congenital disorders of metabolism | 78              | 53              | 1.5                 | 687       |
| Congenital malformations           | 335             | 242             | 1.4                 | 832       |
| Digestive system diseases          | 32              | 32              | 1.0                 | 79        |
| Endocrine and metabolic diseases   | 90              | 63              | 1.4                 | 213       |
| Immune system diseases             | 73              | 56              | 1.3                 | 256       |
| Musculoskeletal diseases           | 129             | 69              | 1.9                 | 149       |
| Nervous system diseases            | 241             | 199             | 1.2                 | 795       |
| Other congenital disorders         | 44              | 39              | 1.1                 | 91        |
| Reproductive system diseases       | 24              | 21              | 1.1                 | 63        |
| Respiratory diseases               | 1               | 1               | 1.0                 | 55        |
| Skin diseases                      | 26              | 22              | 1.2                 | 104       |
| Urinary system diseases            | 33              | 33              | 1.0                 | 66        |
| Other diseases                     | 84              | 68              | 1.2                 | 194       |
